# Supplementary material
Source: publisher figshare collection journal article supplement (https://tandf.figshare.com/ndownloader/files/22080606)
Supplement: Supplementary file 1 [file 22080606]

Supplementary Material **“Visual memory and psychotic symptoms in youth”**

Emily Howes Vallis, Lynn E. MacKenzie, Alyson Zwicker, Vladislav Drobinin, Sheri Rempel, Sabina Abidi, David Lovas, Alexa Bagnell, Lukas Propper, Antonina Omisade, Helen L. Fisher, Barbara Pavlova, and Rudolf Uher

**Content:**

1. **Supplementary Table 1**: Main result excluding participants with schizophrenia spectrum disorders, bipolar disorder, and current depression
2. **Supplementary Table 2:** Sensitivity analysis controlling for general cognitive ability.
3. **Supplementary Table 3:** Sensitivity analysis controlling for attention-deficit/hyperactivity disorder in youth.
4. **Supplementary Table 4:** Sensitivity analysis controlling for autism spectrum disorders in youth.
5. **Supplementary Table 5:** Sensitivity analysis controlling for depressive symptoms in youth.
6. **Supplementary Table 6:** Sensitivity analysis controlling for Rey Complex Figure Test recognition.

**Supplementary Table 1**: Main result excluding participants with schizophrenia spectrum disorders, bipolar disorder, and major depressive episode in the year prior to assessment.

|  | Odds ratio | 95% confidence interval  lower upper | | p-value |
| --- | --- | --- | --- | --- |
| **Visual memory** | **1.75** | **1.02** | **3.01** | **0.043** |
| Age (years) | 0.93 | 0.82 | 1.05 | 0.255 |
| Sex (female) | 0.53 | 0.20 | 1.41 | 0.202 |
| Constant | 0.30 | 0.06 | 1.40 |  |

**Supplementary Table 2.** Sensitivity analysis controlling for general cognitive ability.

|  | Odds ratio | 95% confidence interval  lower upper | | p-value |
| --- | --- | --- | --- | --- |
| **Visual memory** | **1.87** | **1.07** | **3.27** | **0.029** |
| Age (years) | 0.93 | 0.83 | 1.05 | 0.235 |
| Sex (female) | 0.69 | 0.27 | 1.80 | 0.452 |
| **General cognition** | **1.01** | **0.98** | **1.05** | **0.434** |
| Constant | 0.05 | >0.01 | 3.24 |  |

**Supplementary Table 3.** Sensitivity analysis controlling for attention-deficit/hyperactivity disorder (ADHD) in youth.

|  | Odds ratio | 95% confidence interval  lower upper | | p-value |
| --- | --- | --- | --- | --- |
| **Visual memory** | **1.70** | **1.00** | **2.89** | **0.050** |
| Age (years) | 0.93 | 0.83 | 1.06 | 0.287 |
| Sex (female) | 0.74 | 0.28 | 1.97 | 0.552 |
| **ADHD** | **2.57** | **0.97** | **6.84** | **0.058** |
| Constant | 0.18 | 0.04 | 0.89 |  |

**Supplementary Table 4.** Sensitivity analysis controlling for autism spectrum disorders (ASD) in youth.

|  | Odds ratio | 95% confidence interval  lower upper | | p-value |
| --- | --- | --- | --- | --- |
| **Visual memory** | **1.81** | **1.06** | **3.09** | **0.030** |
| Age (years) | 0.93 | 0.82 | 1.04 | 0.204 |
| Sex (female) | 0.71 | 0.27 | 1.87 | 0.490 |
| **ASD** | **2.86** | **0.65** | **12.64** | **0.165** |
| Constant | 0.25 | 0.06 | 1.11 |  |

**Supplementary Table 5.** Sensitivity analysis controlling for depressive symptoms in youth.

|  | Odds ratio | 95% confidence interval  lower upper | | p-value |
| --- | --- | --- | --- | --- |
| **Visual memory** | **1.77** | **1.01** | **3.10** | **0.046** |
| Age (years) | 0.93 | 0.82 | 1.05 | 0.257 |
| Sex (female) | 0.44 | 0.16 | 1.23 | 0.118 |
| **Depressive symptoms** | **1.95** | **1.16** | **3.29** | **0.012** |
| Constant | 0.34 | 0.07 | 1.63 |  |

**Supplementary Table 6.** Sensitivity analysis controlling for Rey Complex Figure Test recognition.

|  | Odds ratio | 95% confidence interval  lower upper | | p-value |
| --- | --- | --- | --- | --- |
| **Visual memory** | **1.65** | **0.92** | **2.95** | **0.092** |
| Age (years) | 0.94 | 0.84 | 1.05 | 0.269 |
| Sex (female) | 0.60 | 0.23 | 1.55 | 0.293 |
| **Recognition** | **1.16** | **0.71** | **1.91** | **0.548** |
| Constant | 0.25 | 0.06 | 1.10 |  |
